# Supplementary material for: Comparative Evaluation of the Foot-and-Mouth Disease Virus Permissive LF-BK αVβ6 Cell Line for Senecavirus A Research
Source: MDPI journal article supplement (doi:10.3390/v14091875), 2022-08-25
Supplement: s1 [file s1]

Table S1: SVA and FMDV geometric mean neutralizing antibody titers ( $\log_{10}$ ) collected on days 0 and 35 for FMD vaccinated and unvaccinated swine.

| Animal ID | SVA neutralizing antibody titers ( $\log_{10}$ ) |        | FMDV neutralizing antibody titers ( $\log_{10}$ ) |        | FMD vaccinated |
|-----------|--------------------------------------------------|--------|---------------------------------------------------|--------|----------------|
|           | Day 0                                            | Day 35 | Day 0                                             | Day 35 |                |
| 51822     | 0.6                                              | 1.2    | 0.6                                               | 1.2    | Yes            |
| 51823     | 0.6                                              | 1.5    | 0.6                                               | 1.8    | Yes            |
| 51824     | 0.6                                              | 1.2    | 0.6                                               | 2.4    | Yes            |
| 51825     | 1.2                                              | 1.2    | 0.6                                               | 1.8    | Yes            |
| 51826     | 1.2                                              | 0.9    | 0.6                                               | 2.1    | Yes            |
| 51827     | 1.8                                              | 0.9    | 0.6                                               | 3.0    | Yes            |
| 51828     | 0.9                                              | 1.5    | 0.6                                               | 1.8    | Yes            |
| 51829     | 1.8                                              | 1.8    | 0.6                                               | 0.9    | Yes            |
| 51830     | 1.2                                              | 0.6    | 0.6                                               | 1.8    | Yes            |
| 51831     | 0.9                                              | 1.2    | 0.6                                               | 2.1    | Yes            |
| 51832     | 0.9                                              | 1.2    | 0.6                                               | 1.2    | Yes            |
| 51833     | 0.9                                              | 0.9    | 0.6                                               | 1.2    | Yes            |
| 51834     | 0.6                                              | 0.6    | 0.6                                               | 2.4    | Yes            |
| 51835     | 0.6                                              | 1.2    | 0.6                                               | 2.1    | Yes            |
| 51836     | 1.2                                              | 1.2    | 0.6                                               | 2.1    | Yes            |
| 51837     | 0.6                                              | 1.2    | 0.6                                               | 2.1    | Yes            |
| 51838     | 0.9                                              | 0.9    | 0.6                                               | 2.4    | Yes            |
| 51839     | 0.9                                              | 0.6    | 0.6                                               | 0.9    | Yes            |
| 51840     | 0.9                                              | 1.2    | 0.6                                               | 1.5    | Yes            |
| 51841     | 1.2                                              | 0.6    | 0.6                                               | 1.2    | Yes            |
| 51842     | 0.6                                              | 0.6    | 0.6                                               | 1.8    | Yes            |
| 51843     | 1.2                                              | 1.2    | 0.6                                               | 1.8    | Yes            |
| 51844     | 0.9                                              | 0.9    | 0.6                                               | 1.5    | Yes            |
| 51845     | 2.4                                              | 0.9    | 0.6                                               | 1.5    | Yes            |
| 51846     | 0.9                                              | 1.2    | 0.6                                               | 0.6    | No             |
| 51847     | 1.2                                              | 0.6    | 0.6                                               | 1.5    | Yes            |
| 51848     | 1.2                                              | 1.2    | 0.6                                               | 1.8    | Yes            |
| 51849     | 0.9                                              | 1.5    | 0.6                                               | 0.9    | Yes            |
| 51850     | 0.6                                              | 0.9    | 0.6                                               | 0.6    | No             |
| 51851     | 0.6                                              | 0.6    | 0.6                                               | 1.2    | Yes            |
| 51852     | 1.2                                              | 0.6    | 0.6                                               | 0.6    | No             |
| 51853     | 0.6                                              | 0.9    | 0.6                                               | 1.8    | Yes            |

|       |     |     |     |     |     |
|-------|-----|-----|-----|-----|-----|
| 51854 | 0.6 | 0.9 | 0.6 | 1.8 | Yes |
| 51855 | 0.9 | 1.2 | 0.6 | 0.6 | No  |
| 51856 | 0.6 | 0.6 | 0.6 | 0.6 | No  |
| 51857 | 0.6 | 0.9 | 0.6 | 0.6 | No  |
| 51858 | 1.2 | 0.6 | 0.6 | 0.6 | No  |
| 51859 | 0.6 | 0.6 | 0.6 | 0.6 | No  |
| 51860 | 0.6 | 0.6 | 0.6 | 0.6 | No  |
| 51861 | 0.9 | 1.2 | 0.6 | 0.6 | No  |
| 53546 | 0.9 | 2.1 | 0.6 | 2.7 | Yes |
| 53547 | 0.6 | 0.6 | 0.6 | 1.8 | Yes |
| 53548 | 0.9 | N/A | 0.6 | N/A | No  |
| 53549 | 0.6 | 0.6 | 0.6 | 2.4 | Yes |
| 53550 | 1.2 | N/A | 0.6 | N/A | No  |
| 53551 | 0.9 | 1.8 | 0.6 | 2.4 | Yes |
| 53552 | 0.6 | 0.6 | 0.6 | 2.4 | Yes |
| 53553 | 0.6 | 0.6 | 0.6 | 2.7 | Yes |
| 53554 | 0.6 | 1.2 | 0.6 | 2.1 | Yes |
| 53555 | 0.6 | 0.9 | 0.6 | 1.8 | Yes |
| 53556 | 1.2 | N/A | 0.6 | N/A | No  |
| 53557 | 0.9 | 0.9 | 0.6 | 1.5 | Yes |
| 53558 | 0.6 | 0.9 | 0.6 | 2.4 | Yes |
| 53559 | 1.2 | 1.5 | 0.6 | 2.4 | Yes |
| 53560 | 1.2 | 0.6 | 0.6 | 2.7 | Yes |
| 53561 | 0.6 | 0.6 | 0.6 | 0.6 | Yes |
| 53562 | 1.2 | 1.2 | 0.6 | 1.5 | Yes |
| 53563 | 0.9 | 0.9 | 0.6 | 2.1 | Yes |
| 53564 | 1.2 | 1.8 | 0.6 | 2.4 | Yes |
| 53565 | 0.6 | 0.9 | 0.6 | 0.6 | No  |
| 53566 | 0.6 | 0.6 | 0.6 | 2.4 | Yes |
| 53567 | 1.2 | 0.6 | 0.6 | 2.7 | Yes |
| 53568 | 1.2 | 1.2 | 0.6 | 1.5 | Yes |
| 53569 | 1.2 | 0.6 | 0.6 | 0.6 | No  |
| 53570 | 1.2 | 1.2 | 0.6 | 0.9 | Yes |
| 53571 | 0.9 | 0.6 | 0.6 | 2.1 | Yes |
| 53572 | 0.6 | 0.9 | 0.6 | 1.2 | Yes |
| 53573 | 1.2 | 0.9 | 0.6 | 0.6 | Yes |
| 53574 | 0.6 | 1.2 | 0.6 | 3.0 | Yes |
| 53575 | 1.2 | 1.2 | 0.6 | 0.6 | No  |
| 53576 | 1.2 | 1.2 | 0.6 | 0.6 | No  |
| 53577 | 0.6 | N/A | 0.6 | N/A | No  |
| 53578 | 0.6 | 1.2 | 0.6 | 2.1 | Yes |
| 53579 | 1.2 | 0.6 | 0.6 | 1.2 | Yes |
| 53580 | 0.9 | 0.6 | 0.6 | 2.7 | Yes |

|       |     |     |     |     |     |
|-------|-----|-----|-----|-----|-----|
| 53581 | 0.9 | 0.6 | 0.6 | N/A | Yes |
| 53582 | 0.6 | 1.2 | 0.6 | 2.7 | Yes |
| 53583 | 0.6 | 1.2 | 0.6 | 2.4 | Yes |
| 53584 | 1.2 | 1.2 | 0.6 | 2.4 | Yes |
| 53585 | 1.2 | N/A | 0.6 | N/A | No  |
| 53586 | 1.2 | 1.2 | 0.6 | 2.1 | Yes |
| 53587 | 0.6 | 1.2 | 0.6 | 3.0 | Yes |
| 53588 | 1.2 | 0.9 | 0.6 | 1.5 | Yes |
| 53589 | 0.9 | 0.9 | 0.6 | 0.6 | No  |
| 53590 | 1.2 | 1.2 | 0.6 | 3.0 | Yes |
